# Supplementary material for: miR396-targeted AtGRF transcription factors are required for coordination of cell division and differentiation during leaf development in Arabidopsis
Source: PubMed Central journal article supplement — J Exp Bot. 2010 Oct 29;62(2):761–73. doi: 10.1093/jxb/erq307 (PMC3003814; doi:10.1093/jxb/erq307), 2010-10-29
Supplement: supp_erq307_00050450-file001.pdf [file supp_erq307_00050450-file001.pdf]

**miR396-targeted AtGRF transcription factors are required for coordination of cell division and differentiation during leaf development in *Arabidopsis***

Li Wang<sup>1,2</sup>, Xiaolu Gu<sup>1</sup>, Deyang Xu<sup>1</sup>, Wei Wang<sup>1</sup>, Hua Wang<sup>1</sup>, Minhuan Zeng<sup>1</sup>,  
Zhaoyang Chang<sup>2</sup>, Hai Huang<sup>1</sup>, Xiaofeng Cui<sup>1\*</sup>

<sup>1</sup> National Laboratory of Plant Molecular Genetics, Shanghai Institute of Plant Physiology and Ecology, Shanghai Institutes for Biological Sciences, Chinese Academy of Sciences, 300 Fenglin Road, Shanghai 200032, China

<sup>2</sup> College of Life Science, Northwest A & F University, Yangling, Shaanxi 712100, China

## Supplemental Data

The following materials are available in the online version of this article.

Supplemental Table S1. The sequences of primers used in this study.

| Name       | Gene          | Sequence (5'-3')                         | Purpose |
|------------|---------------|------------------------------------------|---------|
| AtGRF1-F   | <i>AtGRF1</i> | GCCAATGTCCCTGTTCCATC                     | qPCR    |
| AtGRF1-R   | <i>AtGRF1</i> | CTGTAAGTTCATCGTGGCAGG                    | qPCR    |
| AtGRF2-F1  | <i>AtGRF2</i> | GCATTCAGGGAATCACAATC                     | qPCR    |
| AtGRF2-R1  | <i>AtGRF2</i> | TCAGGTTGTGTAATGAAAGTAATC                 | qPCR    |
| AtGRF3-F   | <i>AtGRF3</i> | CTGAACTTCTCCACCTTAGTC                    | qPCR    |
| AtGRF3-R   | <i>AtGRF3</i> | CACTGGTCAATGAAAGGCTTG                    | qPCR    |
| AtGRF4-F   | <i>AtGRF4</i> | TGTTCCATGGACTTGCAACTG                    | qPCR    |
| AtGRF4-R   | <i>AtGRF4</i> | GCCGTCAGTTCTCTTACACCT                    | qPCR    |
| AtGRF5-F   | <i>AtGRF5</i> | GTTGTCTGATTCTGATCAAGAG                   | qPCR    |
| AtGRF5-R   | <i>AtGRF5</i> | GAGAATAAGATGATGAGTCT                     | qPCR    |
| AtGRF6-F   | <i>AtGRF6</i> | CTGATGGCAAGAAATGGAG                      | qPCR    |
| AtGRF6-R   | <i>AtGRF6</i> | TCAAATGAAGAGTGAAGTAG                     | qPCR    |
| AtGRF7-F   | <i>AtGRF7</i> | CTCAAACCTATAGAGACTCC                     | qPCR    |
| AtGRF7-R   | <i>AtGRF7</i> | CTAAACCTGGCTGCTTTTCG                     | qPCR    |
| AtGRF8-F   | <i>AtGRF8</i> | GCCTCCTCTCCATATGATC                      | qPCR    |
| AtGRF8-R   | <i>AtGRF8</i> | TTAGCTTGAGCTTCTGCTGCAGC                  | qPCR    |
| AtGRF9-F1  | <i>AtGRF9</i> | CTCAAGCAACAGGAAGAATG                     | qPCR    |
| AtGRF9-R1  | <i>AtGRF9</i> | AACACCTGGTGAAAACAAAGAC                   | qPCR    |
| AtGRF2-F2  | <i>AtGRF2</i> | CCTGTTGTCGCTGGTAATAC                     | probe   |
| AtGRF2-R2  | <i>AtGRF2</i> | GATTGGTATCCAAGTATTCACC                   | probe   |
| AtGRF9-F   | <i>AtGRF9</i> | AGATCTATGCAGAGCCCTAAAATGGAGC             | clone   |
| AtGRF9-R   | <i>AtGRF9</i> | ACTTCTAGACTAAACACCTGGTGAAAAC             | clone   |
| rAtGRF9-F1 | <i>AtGRF9</i> | CAGCCGCAAATTGGTAGAGTCTTCTTCTGAG<br>GTTGC | clone   |

|            |                   |                                          |                 |
|------------|-------------------|------------------------------------------|-----------------|
| rAtGRF9-R1 | <i>AtGRF9</i>     | CTCTACCAATTTGCGGCTGCGTTTACGACCT<br>CTATG | clone           |
| p396A-F    | <i>miR396a</i>    | CACCGATGAGGACATGAGCTCTTTCGAGC            | promoter        |
| p396A-R    | <i>miR396a</i>    | GAATACAGAGAGGGTCATGTAGAG                 | promoter        |
| p396B-F    | <i>miR396b</i>    | CACCCCGATTGTCCGTGGTAAACCGCG              | promoter        |
| p396B-R    | <i>miR396b</i>    | AAGTATGACCAGGATCTTCATC                   | promoter        |
| H4-F       | <i>Histone H4</i> | ACACGG ATC GAT ATC TCA GCC               | probe           |
| H4-R       | <i>Histone H4</i> | CAC CGA ATC CGT AAA GAG TCC              | probe           |
| pAS1-F     | <i>AS1</i>        | AAGCTTACGGAGGGTGTGAGTGAGTAGT             | promoter        |
| pAS1-R     | <i>AS1</i>        | GAGCTCCTCCTACTCCTCCTGACATCAC             | promoter        |
| pSTM-F     | <i>STM</i>        | AAGCTTAGAAATGGCAGTGAAGGCAGTG             | promoter        |
| pSTM-R     | <i>STM</i>        | GAGCTCACTAGTATTATTATCACTTTGG             | promoter        |
| pAN3-F     | <i>AN3</i>        | AAGCTTTCGGATCCATTTTTGGTACCAAC            | promoter        |
| pAN3-R     | <i>AN3</i>        | GAGCTCTTCTTTTGCTATTTTATATAAAACCT<br>G    | promoter        |
| pREV-F     | <i>REV</i>        | ATCAAGCTTGAATTCAATTGTA ACTACTAAC         | promoter        |
| pREV-R     | <i>REV</i>        | ATCGAGCTCTCGACCCTCAAAAAAAGTCTC           | promoter        |
| An3-F      | <i>AN3</i>        | ATCACTAGTGAATTCATGCAACAGCACCTGA<br>TGCAG | T-DNA,<br>probe |
| An3-R      | <i>AN3</i>        | ATCGGATCCATTCATCATCTGATGATTTTC           | T-DNA,<br>probe |
| ACTIN-F    | <i>ACTIN</i>      | TGGCATCA(T/C)ACTTTCTACAA                 | qPCR            |
| ACTIN-R    | <i>ACTIN</i>      | CCACCACT(G/A/T)AGCACAATGTT               | qPCR            |
| FIL-F      | <i>FIL</i>        | CTTACTTCAATCCCCAGG                       | probe           |
| FIL-R      | <i>FIL</i>        | CTTTTGGACATGATAAACCC                     | probe           |

---

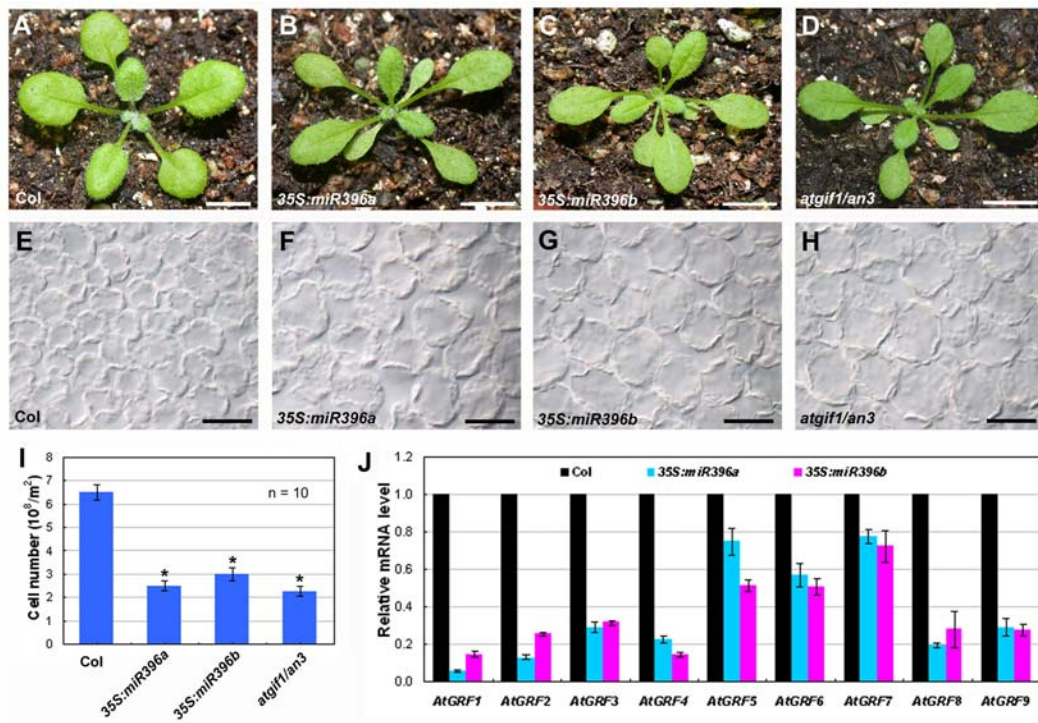

**Supplemental Fig. S1 miR396 negatively regulates cell proliferation by repressing *AtGRFs* expression in the leaves.** (A-D) Morphological observations of leaf development of wild-type Col (A), *35S:miR396a* (B), *35S:miR396b* (C) and *atgif1/an3* (D) plants. (E-H) Palisade cells of the first appearing rosette leaves of 3-week-old wild-type (E) and *ae7* (D,G) *35S:miR396a* (F), *35S:miR396b* (G) and *atgif1/an3* (H) seedlings, showing that the cell size in F,G and H is enlarged. (I) Compared with the wild-type plant, the number of palisade cells in the first rosette leaves of *35S:miR396a*, *35S:miR396b* and *atgif1/an3* plants is reduced. \* Significant statistical differences by t-test ( $P < 0.05$ ). (J) qRT-PCR to analyze the transcript levels of *AtGRFs* in 14-day-old plants of wild type, *35S:miR396a*, and *35S:miR396b* plants. Error bars in I and J indicate SE. Bars =1 cm in A-D, and 100  $\mu$ m in E-H.

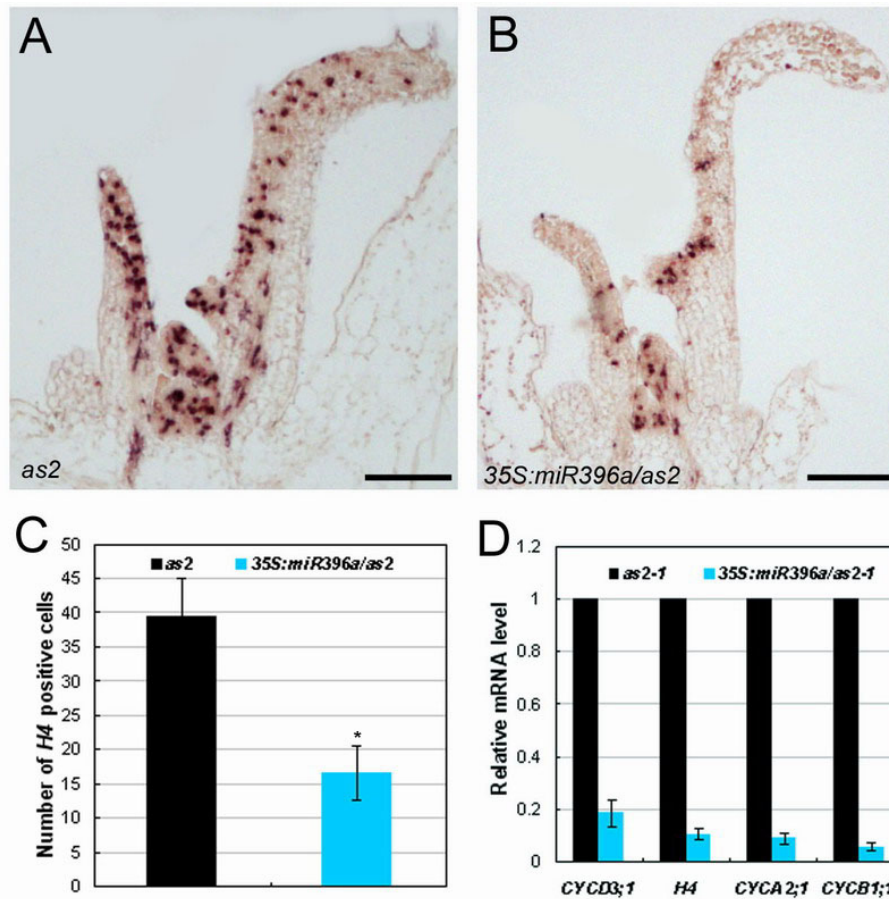

**Supplemental Fig. S2 *In situ* hybridization and qRT-PCR analyses of cell cycle-related genes in *as2* and *35S:miR396a/as2* transgenic plants.**

(A-B) *In situ* hybridization analysis of histone *H4* expression in shoot apices of 13-day-old *as2* (A) and *35S:miR396a/as2* (B) seedlings. (C) Statistical analysis of the number of histone *H4* positive cells in leaves of the 13-day-old *as2* and *35S:miR396a/as2* seedlings. \* Significant statistical differences by t-test ( $P < 0.05$ ). (D) Expression of cell cycle-related genes in 13-day-old *as2* and *35S:miR396a/as2* seedlings. Bars = 100  $\mu\text{m}$  in A and B.

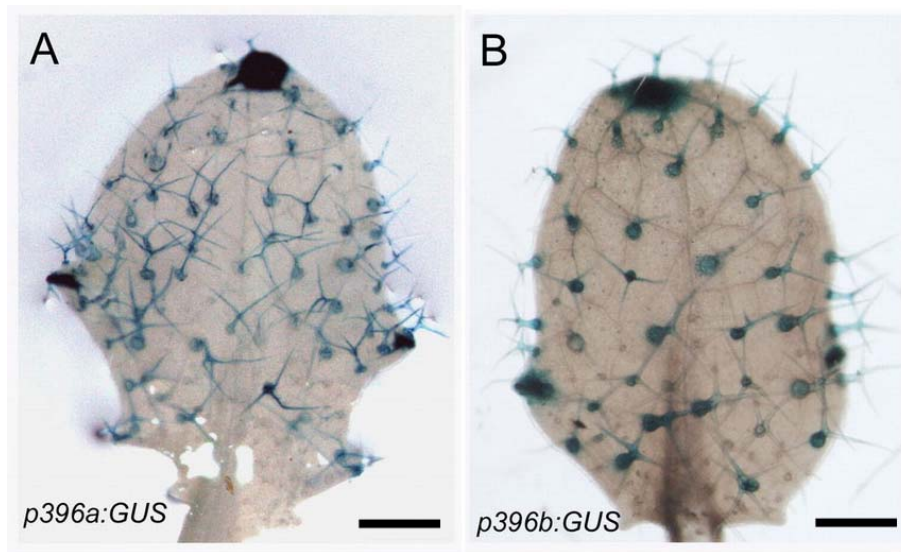

**Supplemental Fig. S3 Expression of *p396a:GUS* and *p396b:GUS* in leaf trichomes.**

(A-B) GUS staining of *p396a:GUS* (A) and *p396b:GUS* (B) transgenic leaves showing the strong signals in leaf trichomes. Bars = 1 mm in A and B.
